# Supplementary material for: Design, Synthesis, and In Vitro Evaluation of Novel 8-Amino-Quinoline Combined with Natural Antioxidant Acids
Source: Pharmaceuticals (Basel). 2022 May 31;15(6):688. doi: 10.3390/ph15060688 (PMC9229476; doi:10.3390/ph15060688)
Supplement: Supplementary file 1 [file pharmaceuticals-15-00688-s001.zip › pharmaceuticals-1680685-supplementary.pdf]

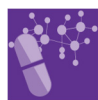

## Article

# Design, synthesis and in vitro evaluation of novel 8-amino-quinoline combined with natural antioxidant acids

Andrea Bacci<sup>1</sup>, Francesca Corsi<sup>1</sup>, Massimiliano Runfola<sup>1</sup>, Simona Sestito<sup>2</sup>, Ilaria Piano<sup>1</sup>, Clementina Manera<sup>1</sup>, Giuseppe Saccomanni<sup>1</sup>, Claudia Gargini<sup>1</sup>, Simona Rapposelli <sup>\*1,3</sup>

1. Department of Pharmacy, University of Pisa, Via Bonanno 6, 56126 Pisa, Italy
  2. Department of Chemistry and Pharmacy, University of Sassari, Via Vienna 2, 07100 Sassari
  3. CISUP, Center for Instrument Sharing, University of Pisa, 56126 Pisa, Italy
- \* Corresponding Authors: S.R. [simona.rapposelli@unipi.it](mailto:simona.rapposelli@unipi.it)

## Contents

|                                                                 |       |
|-----------------------------------------------------------------|-------|
| <sup>1</sup> H-NMR and <sup>13</sup> C NMR spectra of 1-8 ..... | S1-S9 |
| HPLC Analysis of 1-8.....                                       | S10   |
| Copper chelating study .....                                    | S18   |
| DPPH assay .....                                                | S18   |
| Cell viability .....                                            | S19   |

## 1. <sup>1</sup>H-NMR AND <sup>13</sup>C-NMR SPECTRA OF FINAL PRODUCTS 1-8

5-(1,2-dithiolan-3-yl)-N-(2-oxo-2-(quinolin-8-ylamino)ethyl)pentanamide (1)

### <sup>1</sup>H-NMR

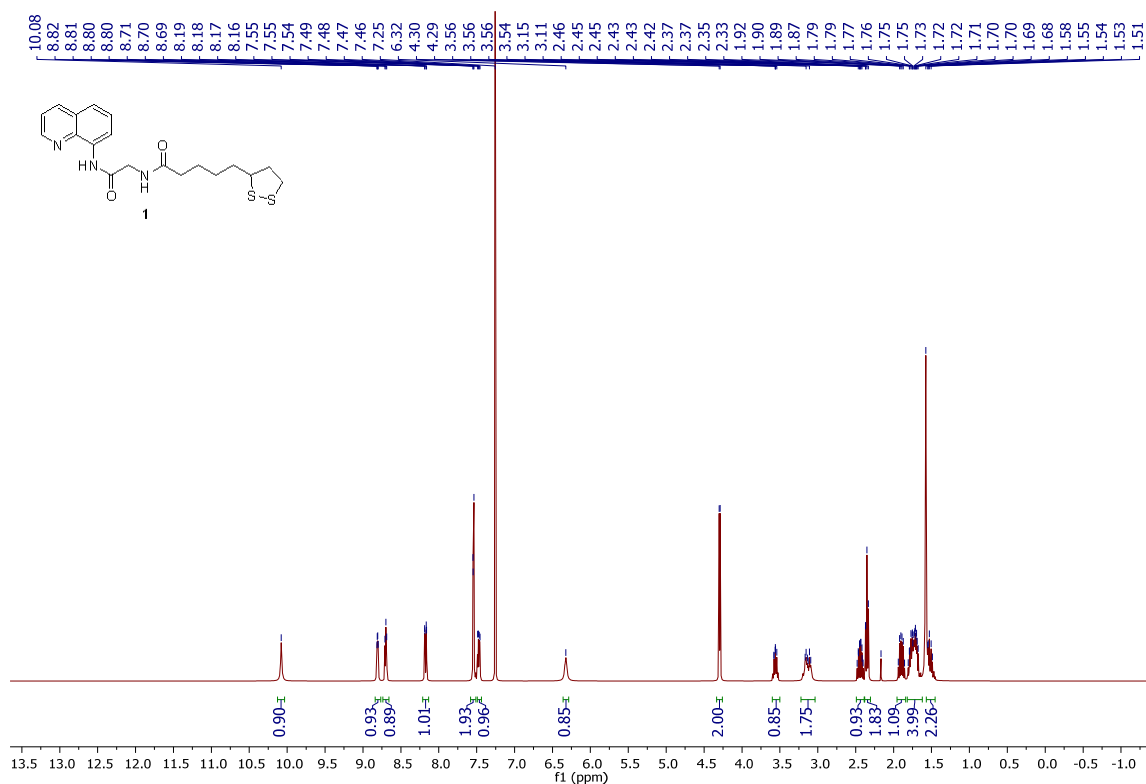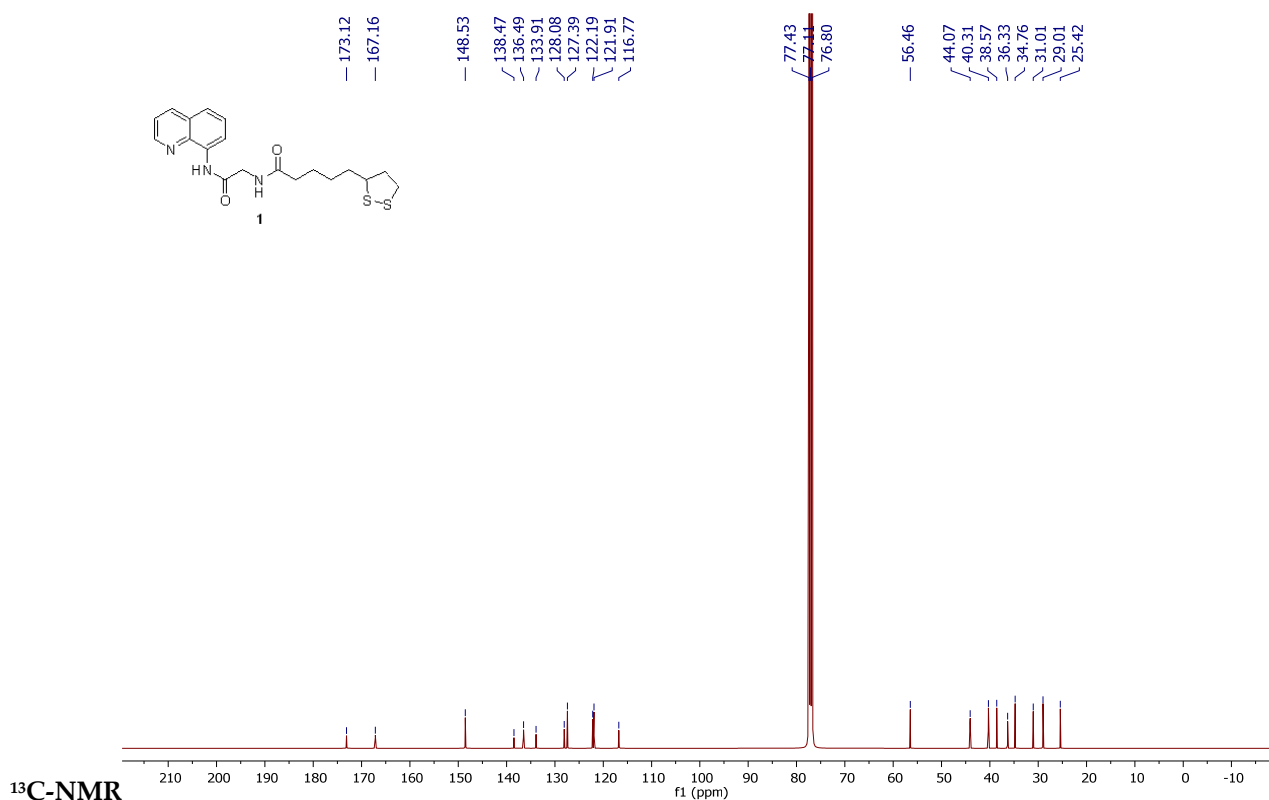

### 5-(1,2-dithiolan-3-yl)-N-(3-oxo-3-(quinolin-8-ylamino)propyl)pentanamide (2)

#### <sup>1</sup>H-NMR

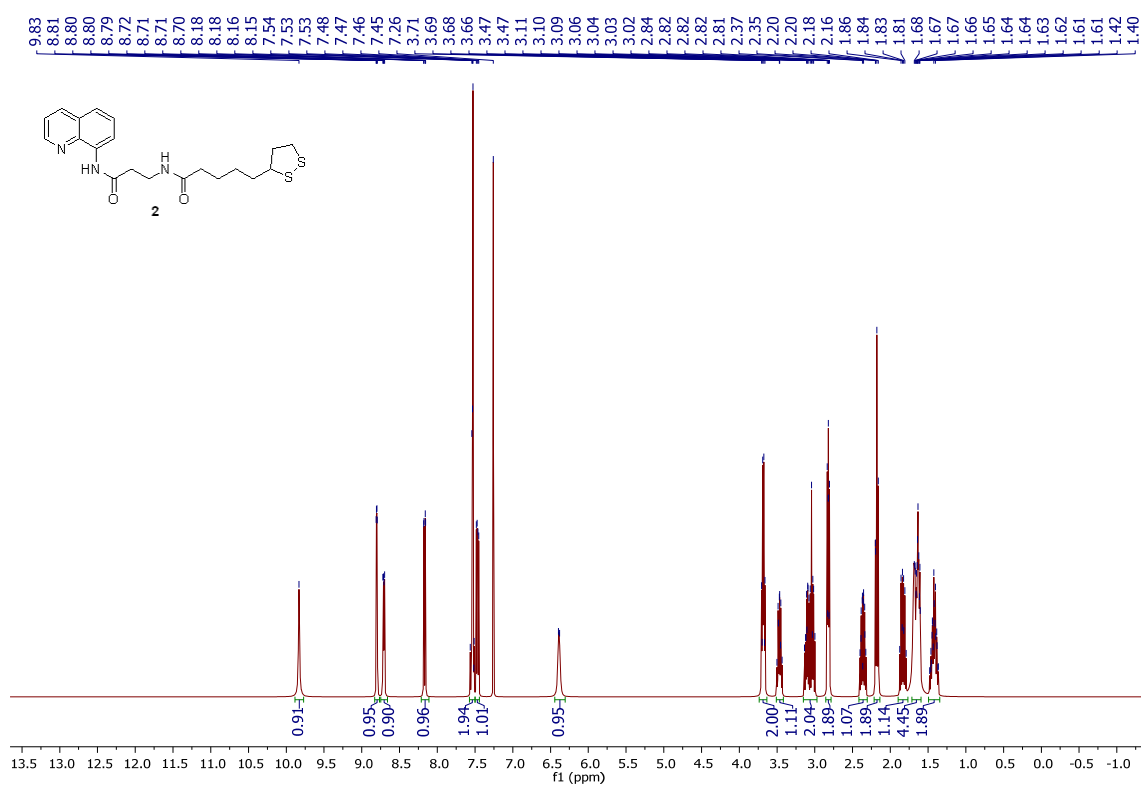**<sup>13</sup>C-NMR**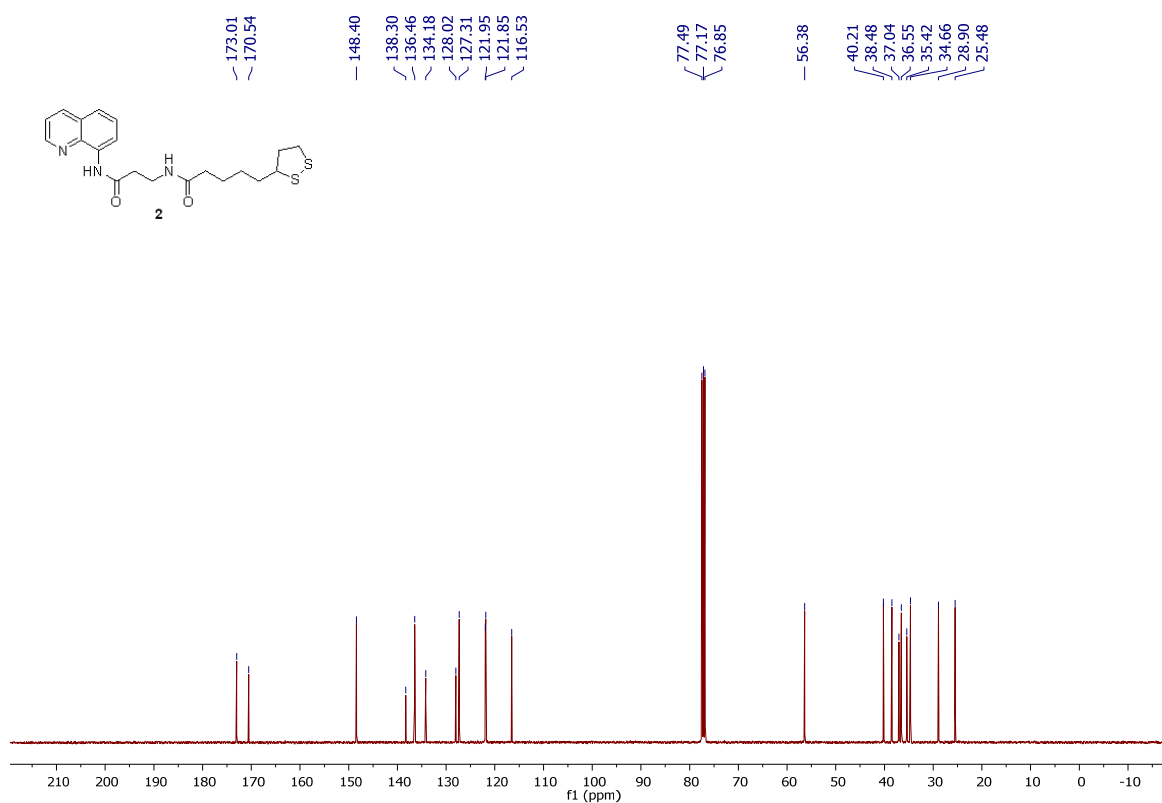**5-(1,2-dithiolan-3-yl)-N-(4-oxo-4-(quinolin-8-ylamino)butyl)pentanamide (3)****<sup>1</sup>H-NMR**

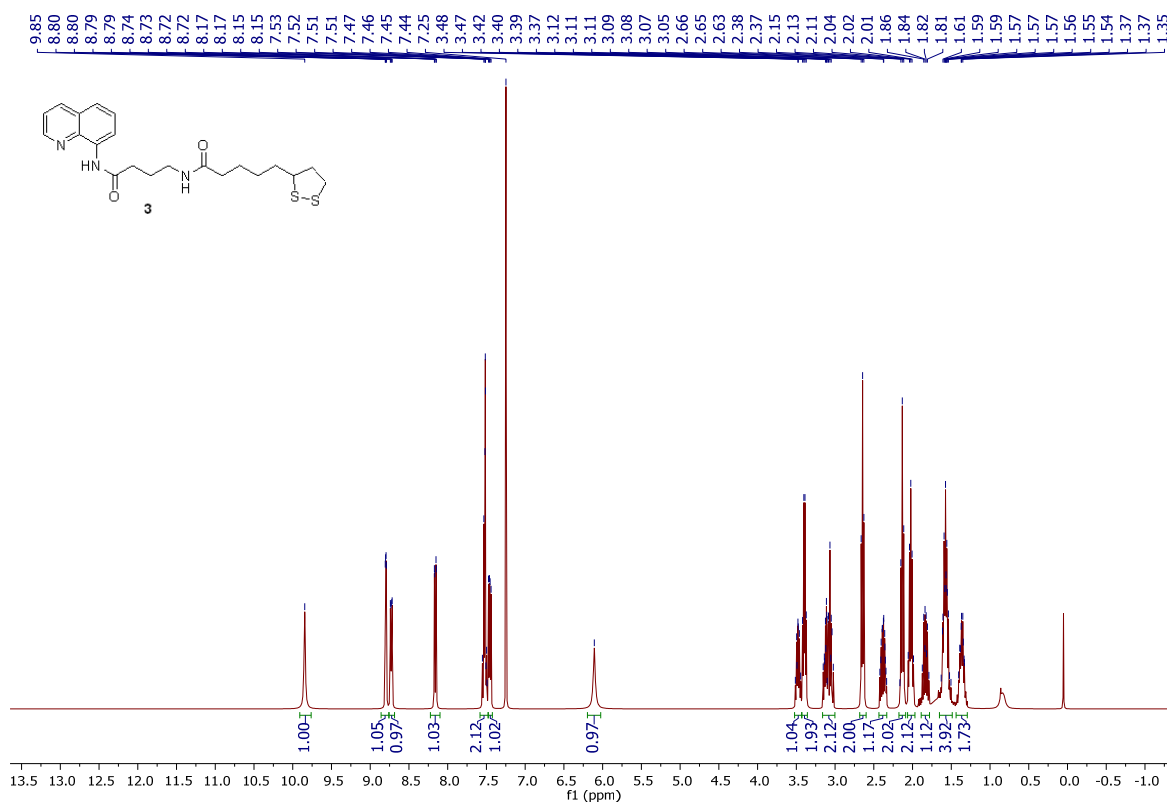**<sup>13</sup>C-NMR**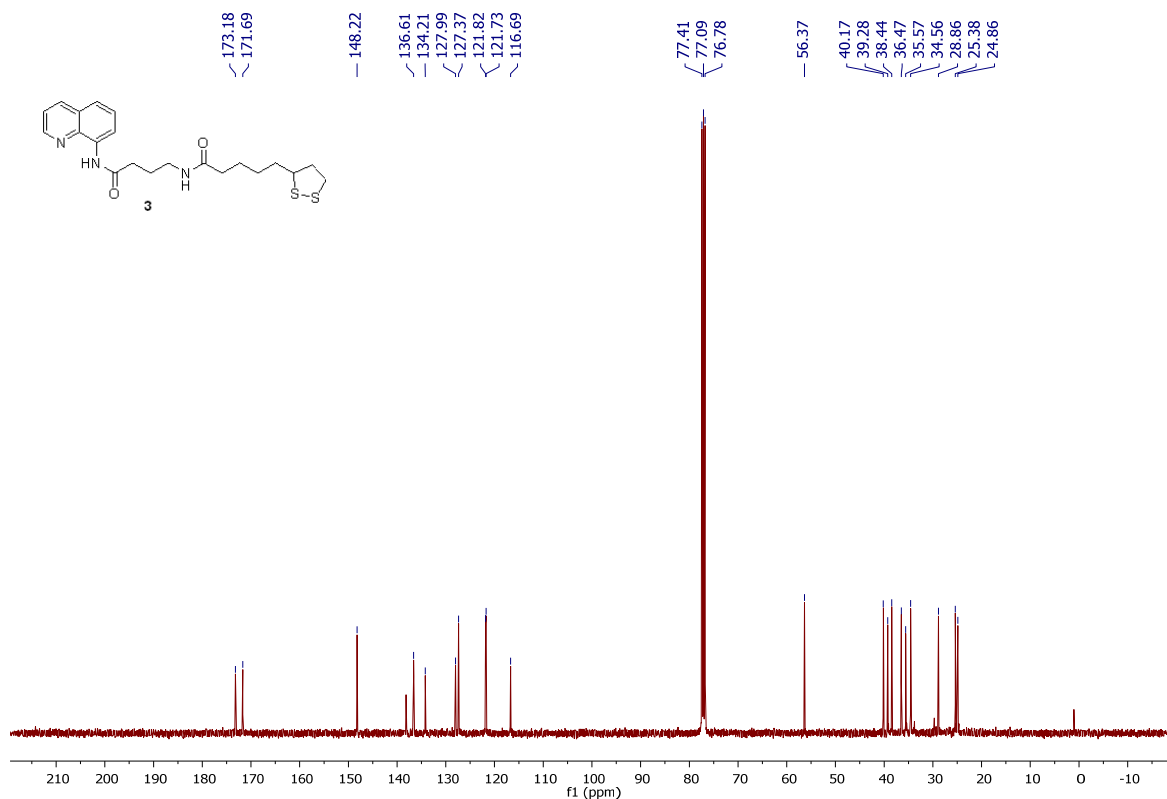**(E)-3-(3,4-dihydroxyphenyl)-N-(2-oxo-2-(quinolin-8-ylamino)ethyl)acrylamide (4)****<sup>1</sup>H-NMR**

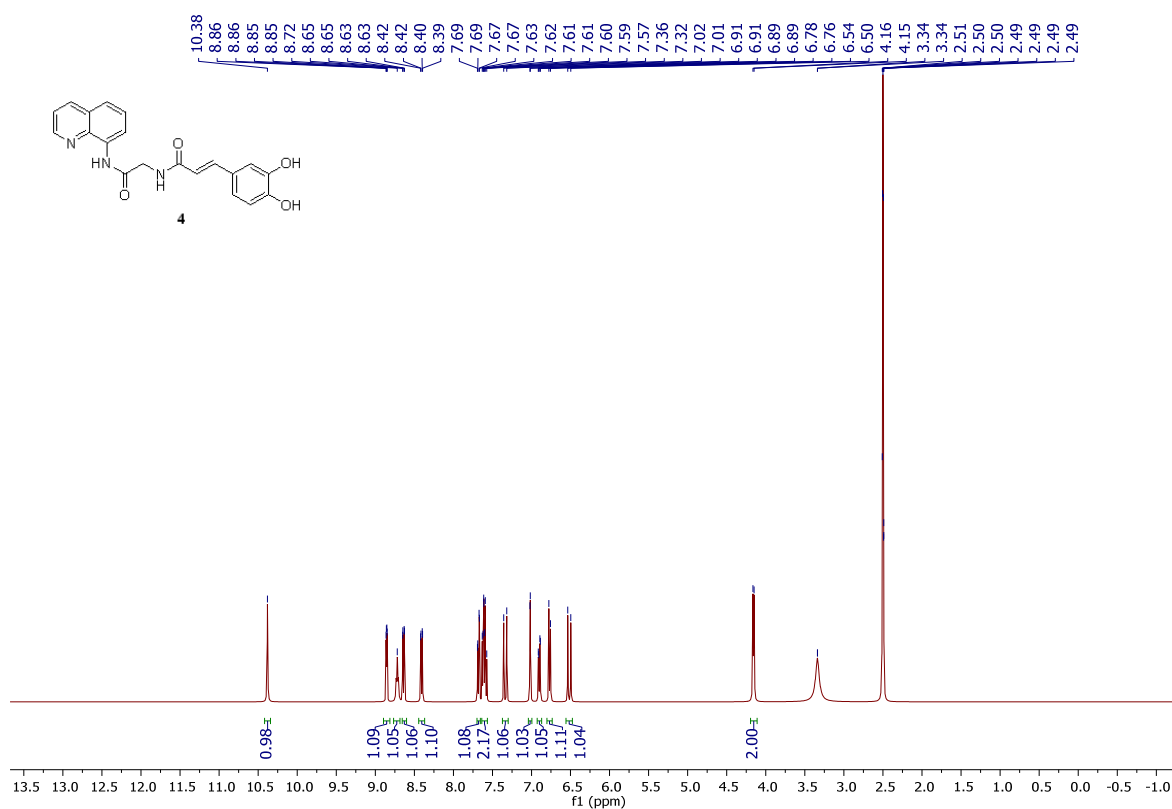**<sup>13</sup>C-NMR**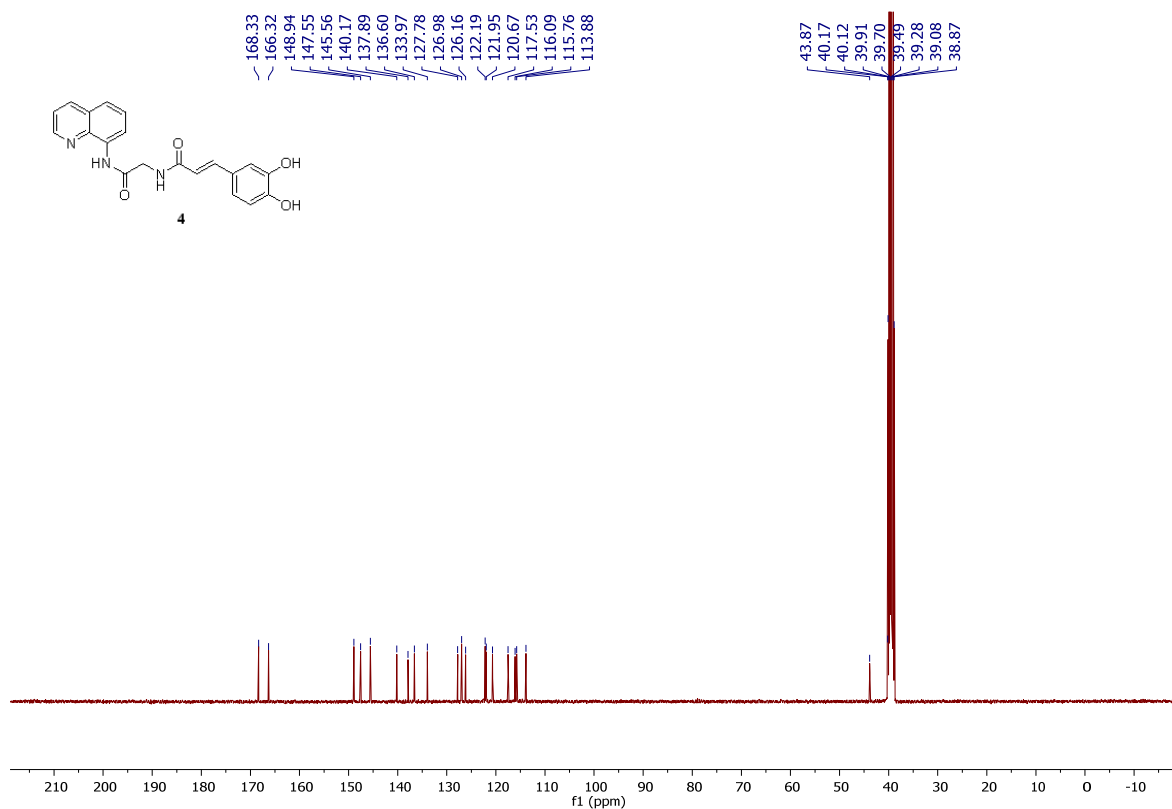**(E)-3-(3,4-dihydroxyphenyl)-N-(3-oxo-3-(quinolin-8-ylamino)propyl)acrylamide (5)**

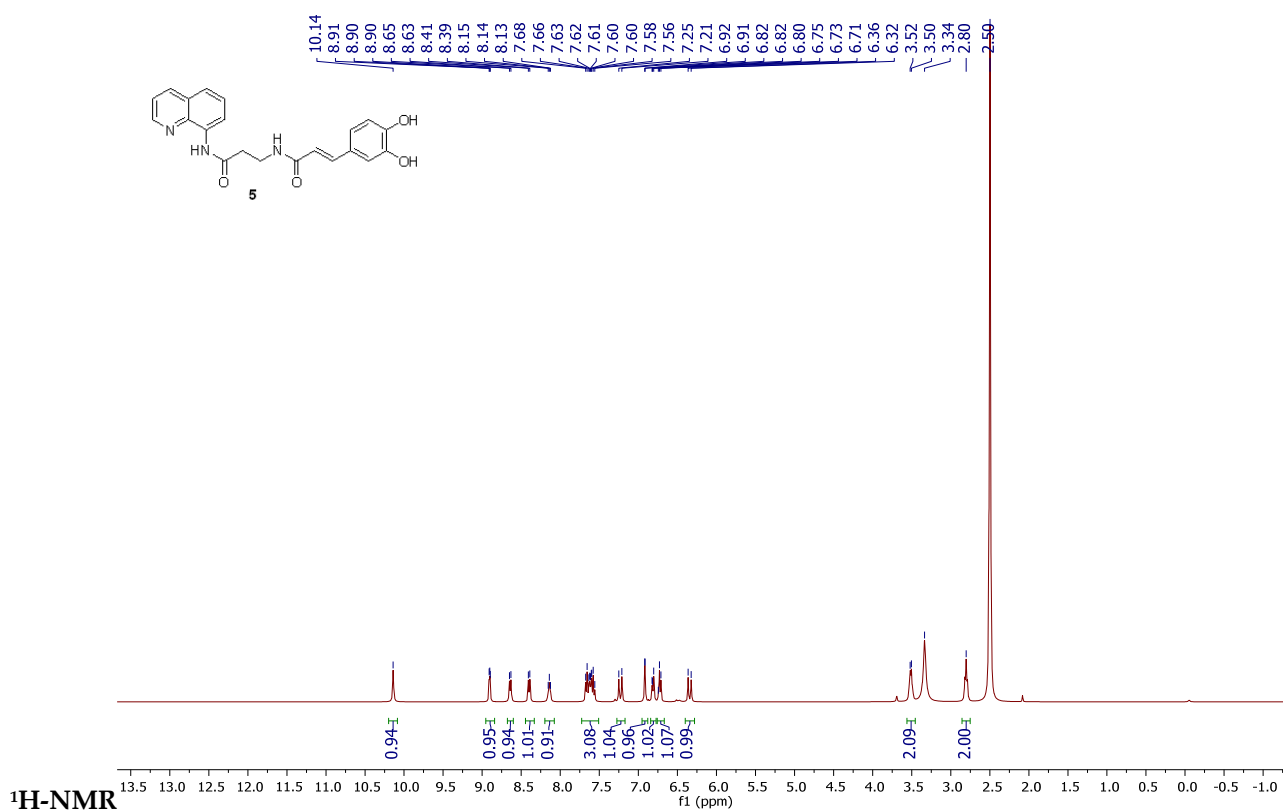**<sup>13</sup>C-NMR**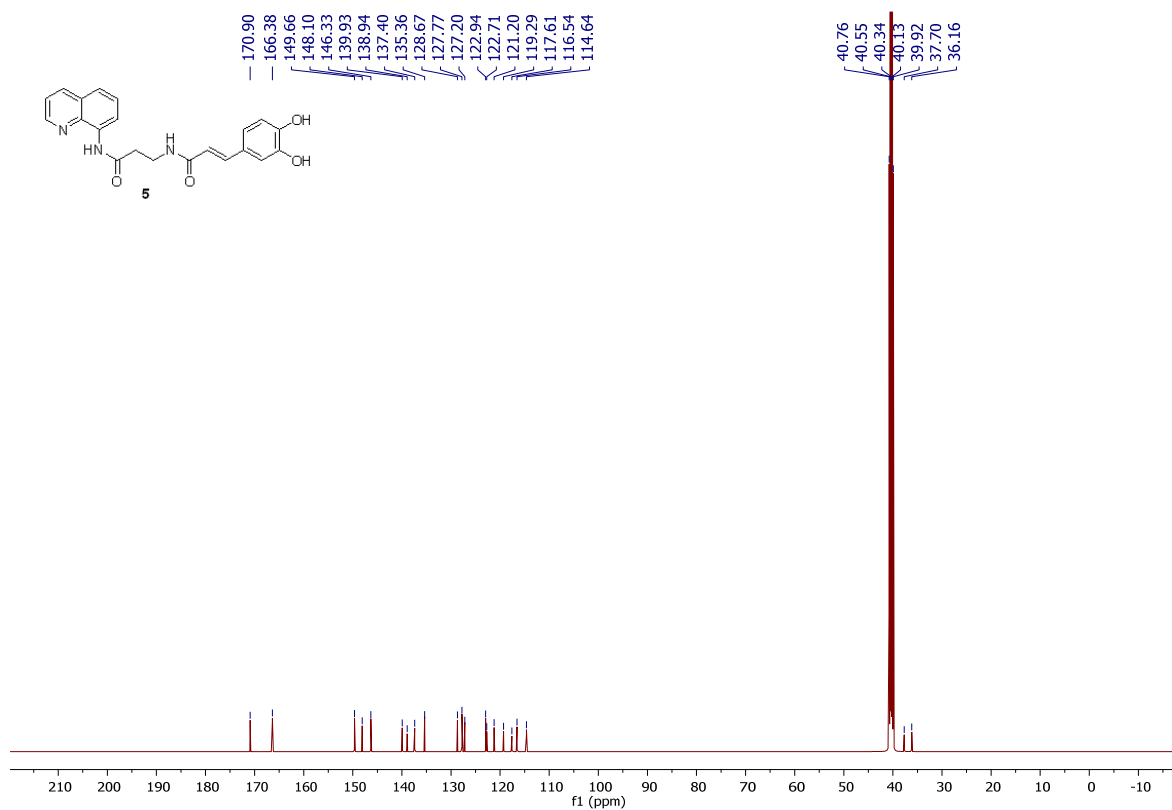**(E)-4-(3-(3,4-dihydroxyphenyl)acrylamido)-N-(quinolin-8-yl)butanamide (6)****<sup>1</sup>H-NMR**

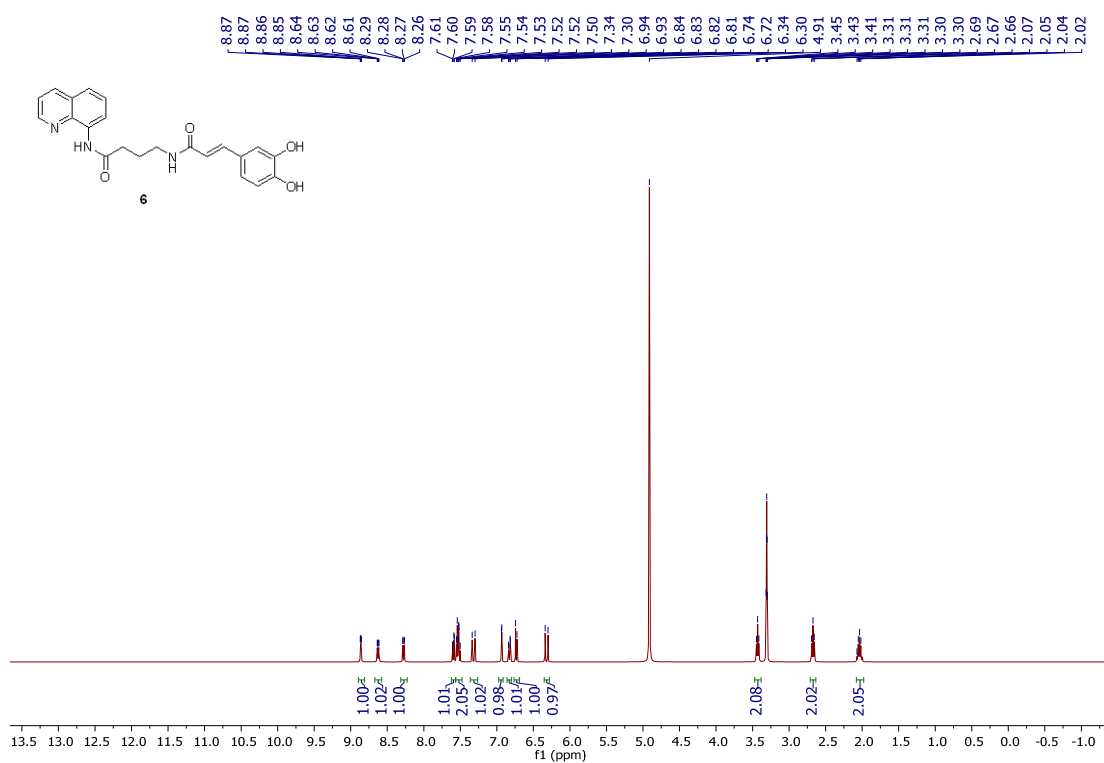**<sup>13</sup>C-NMR**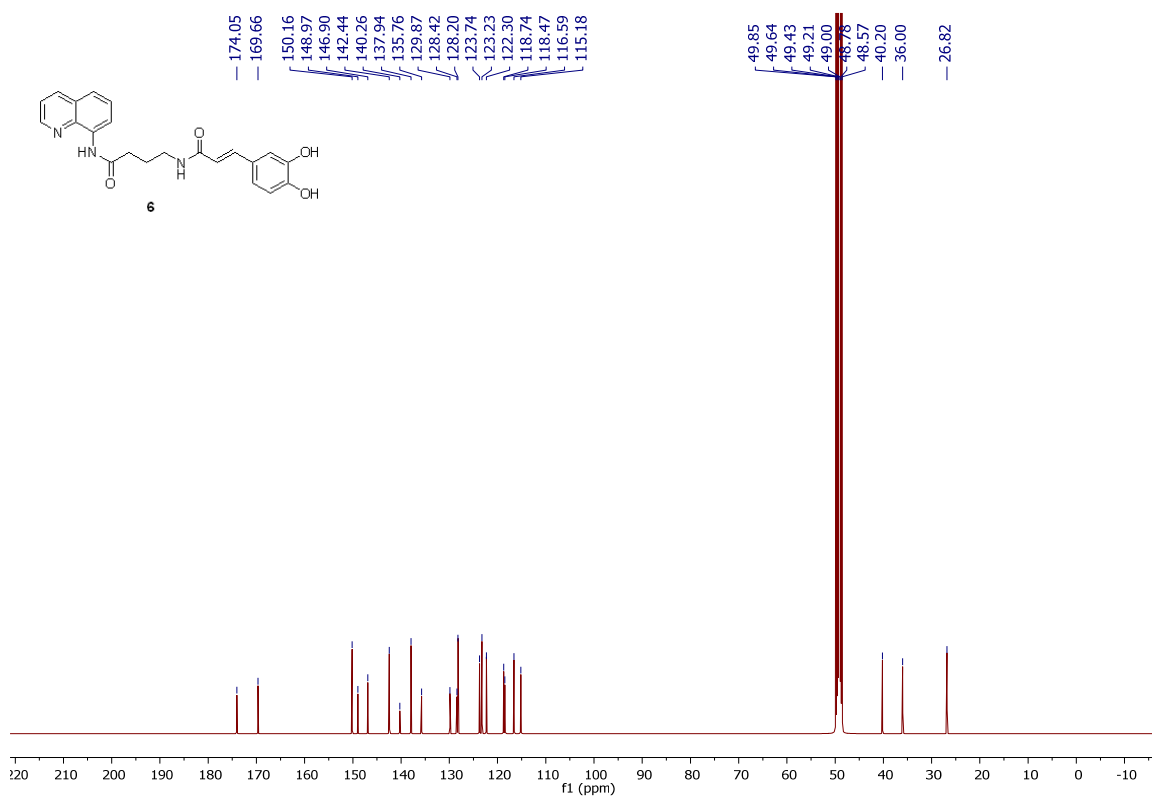**(E)-3-(4-hydroxy-3-methoxyphenyl)-N-(2-oxo-2-(quinolin-8-ylamino)ethyl)acrylamide (7)****<sup>1</sup>H-NMR**

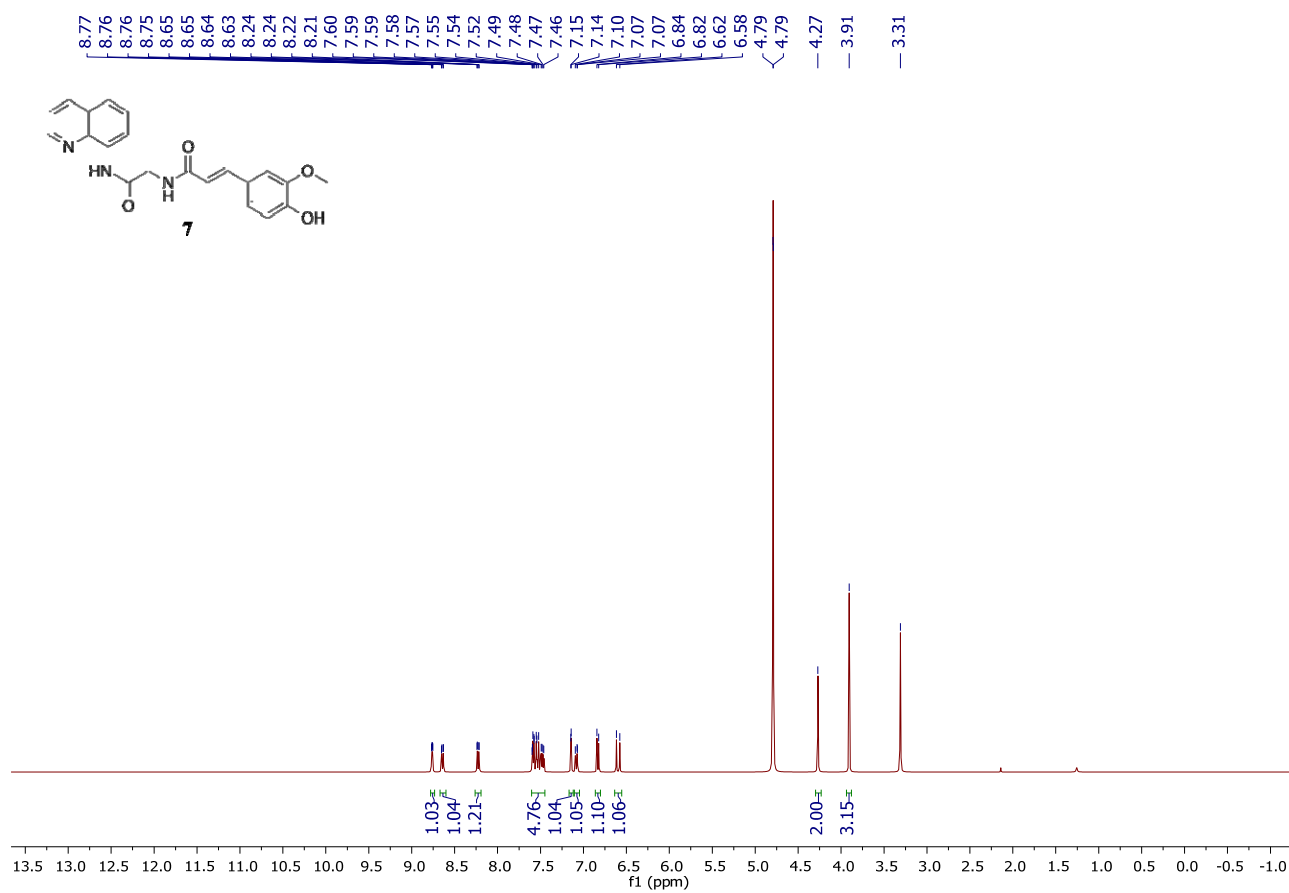<sup>13</sup>C-NMR

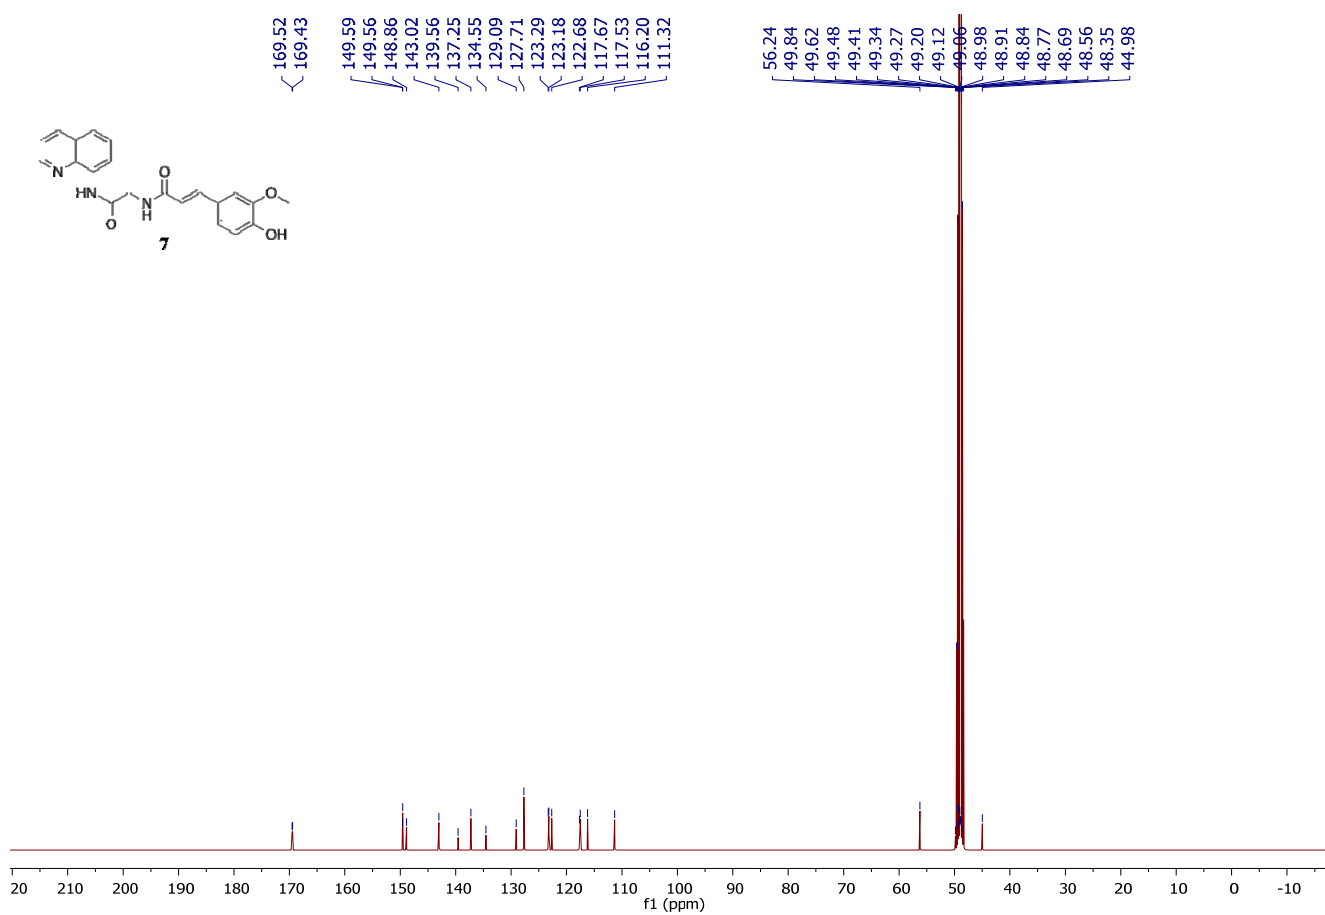

(E)-4-(3-(4-hydroxy-3-methoxyphenyl)acrylamido)-N-(quinolin-8-yl)butanamide (8)

<sup>1</sup>H-NMR

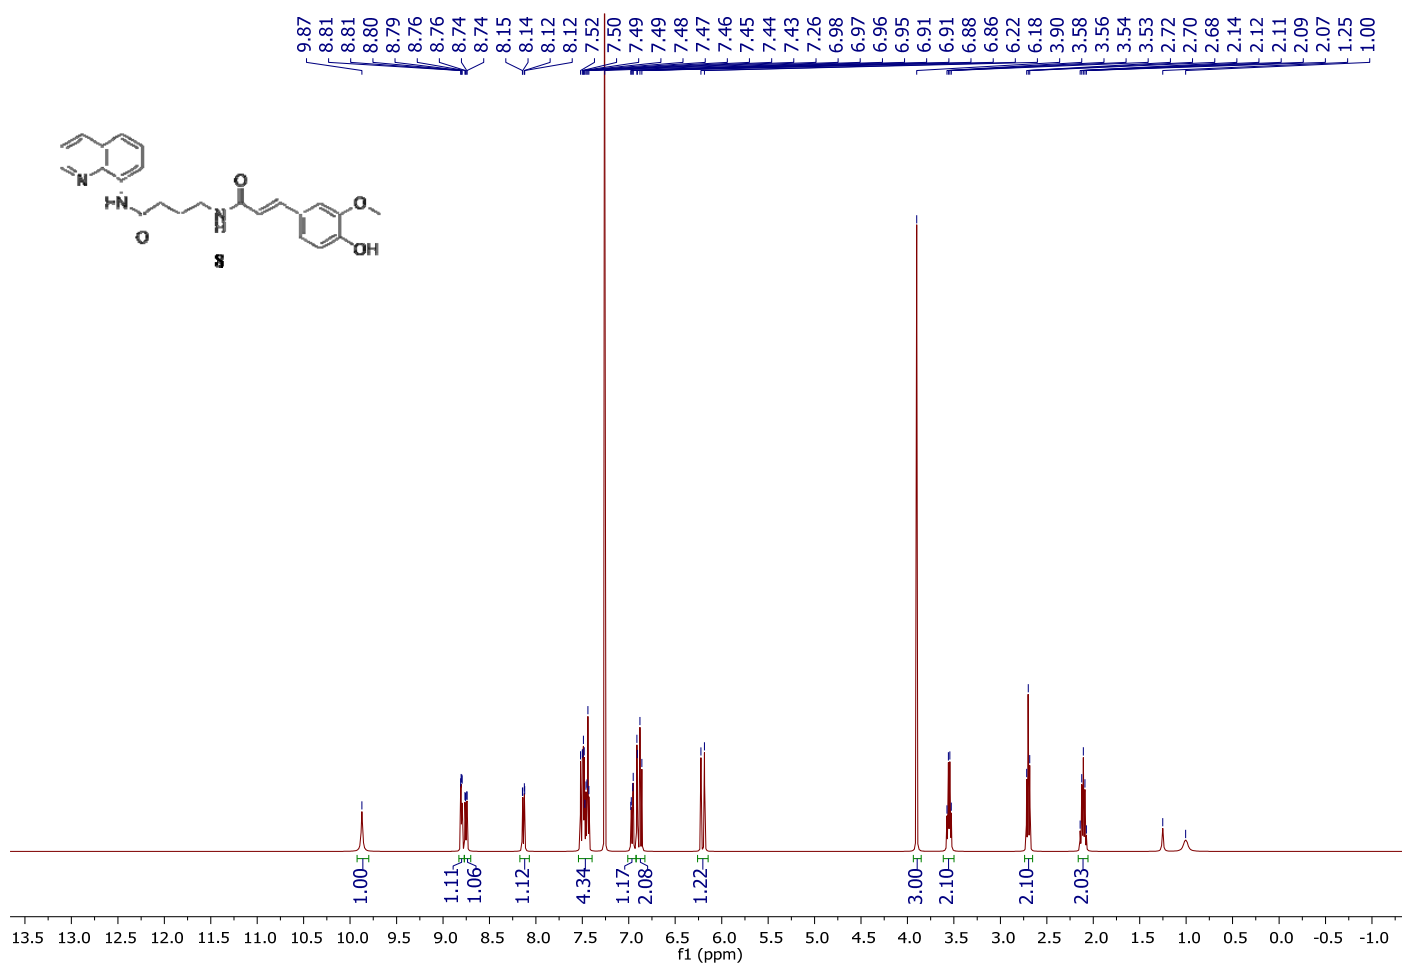<sup>13</sup>C-NMR

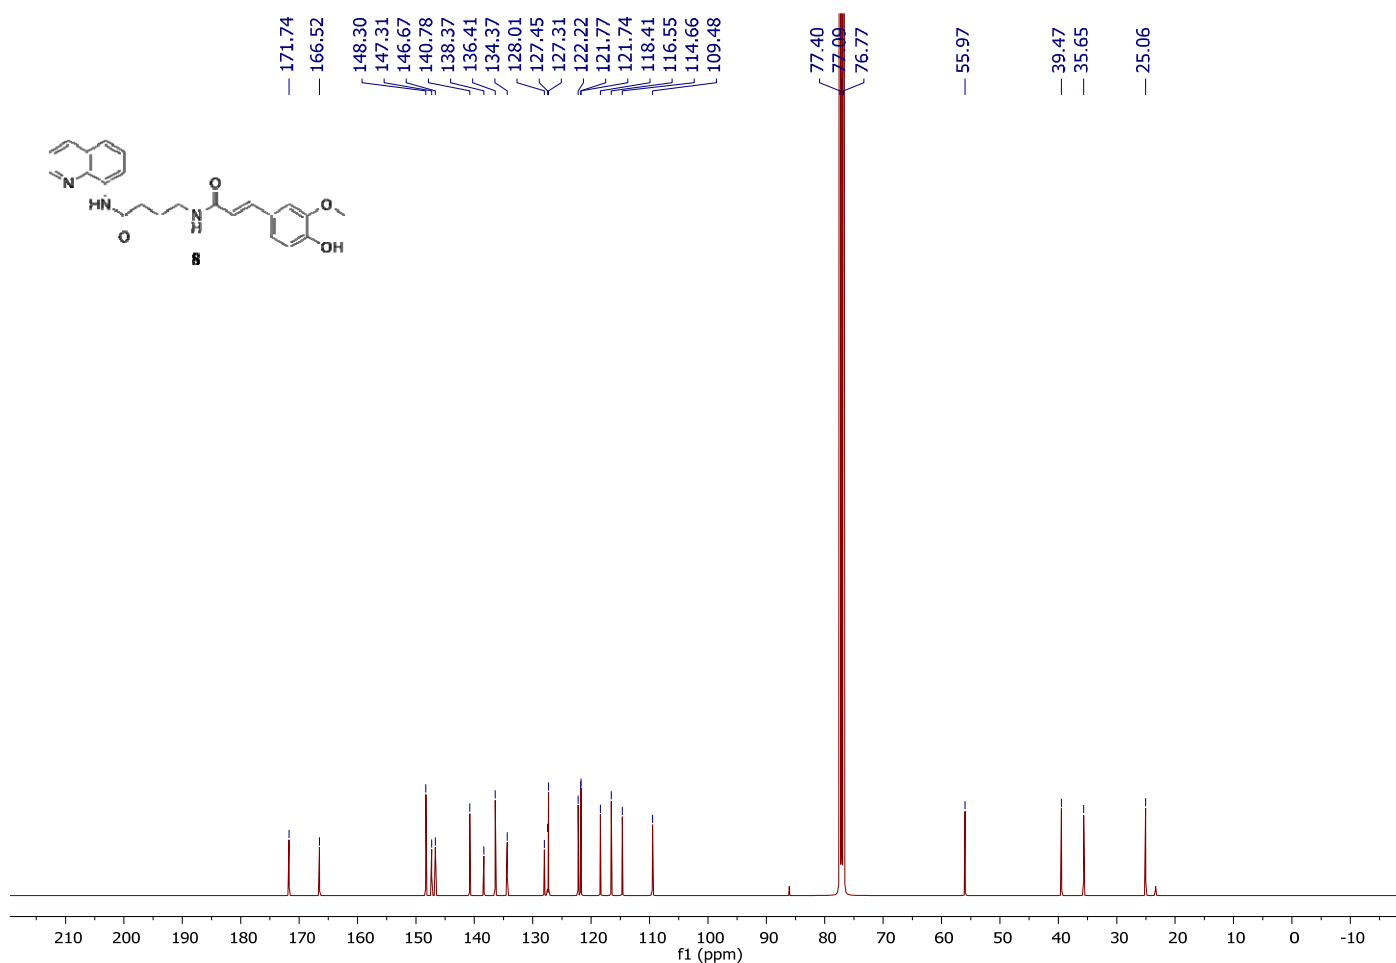

## 2. HPLC analysis

HPLC purity determination was performed on a Varian Pro Star 330PDA detector, a ternary HPLC pump Varian 9012 and a Rehodyne injector with 20  $\mu$ l loop. A RP column Thermoscientific TM Hypersil TM C18 ODS (5  $\mu$ m, 250  $\times$  4.6 mmID) HPLC was used for all analysis (detection at 240 nm). Stock solutions of compounds 1-8 were prepared in a mixture of MeOH/ACN (2:3) and stored at 4°C. As the mobile phase, acetonitrile was used as eluent (A) and eluent (B) was water, with the elution gradient varying according to the method depicted in the table. HPLC analysis confirmed the  $\geq 95\%$  purity of all compounds 1-8.

| Time (minutes) | Flow rate (mL/min) | %ACN (A) | %H <sub>2</sub> O (B) |
|----------------|--------------------|----------|-----------------------|
| Initial        | 0.60               | 20       | 80                    |
| 20 min         | 0.60               | 80       | 20                    |
| 30 min         | 0.60               | 20       | 80                    |

Compound 1

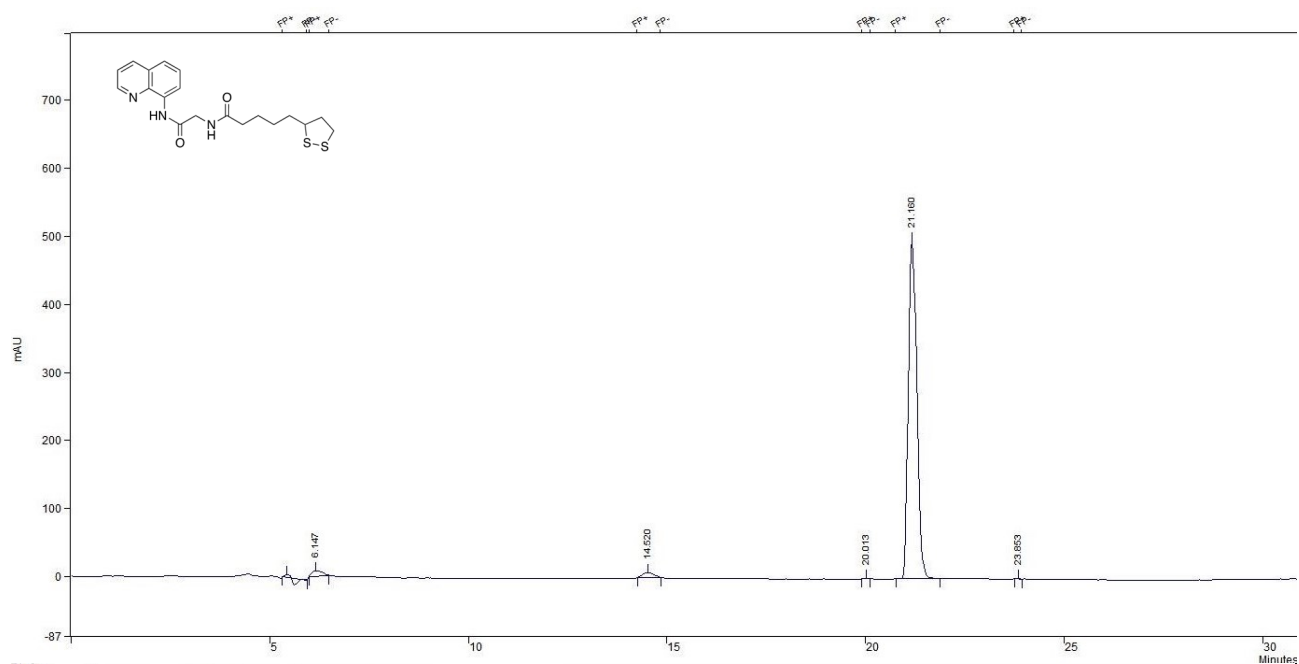

Title :  
 Run File : c:\documents and settings\varian\desktop\bacci\compound 1 h acn.run  
 Method File : c:\star\data\bacci\si58 h acn 1-12 c-2.mth  
 Sample ID : si58 h acn 1-12 c

Injection Date: 11/05/2022 12.53 Calculation Date: 11/05/2022 13.49

Operator :  
 Workstation: HPLC  
 Instrument : Varian Star #1  
 Channel : 2 = 240.00 nm  
 Detector Type: 330 UV-Vis. PDA  
 Bus Address : 71  
 Sample Rate : 0.63 Hz  
 Run Time : 31.013 min

\*\* LC Workstation Version 6.41 \*\* 01938-61c0-ea4-04b0 \*\*

Run Mode : Analysis  
 Peak Measurement: Peak Area  
 Calculation Type: Percent

| Peak No. | Peak Name | Result (%) | Ret. Time (min) | Time Offset (min) | Area (counts) | Sep. 1/2 Code (sec) | Status Codes |
|----------|-----------|------------|-----------------|-------------------|---------------|---------------------|--------------|
| 1        |           | 2.0315     | 6.147           | 0.000             | 901499        | BB 21.3             |              |
| 2        |           | 1.8085     | 14.520          | 0.000             | 713510        | BB 19.5             |              |
| 3        |           | 0.0545     | 20.013          | 0.000             | 21515         | BB 8.6              |              |
| 4        |           | 96.0749    | 21.160          | 0.000             | 37905088      | BB 14.2             |              |
| 5        |           | 0.0306     | 23.853          | 0.000             | 12080         | BB 6.1              |              |
| Totals:  |           | 100.0000   |                 | 0.000             | 39453692      |                     |              |

Compound 2

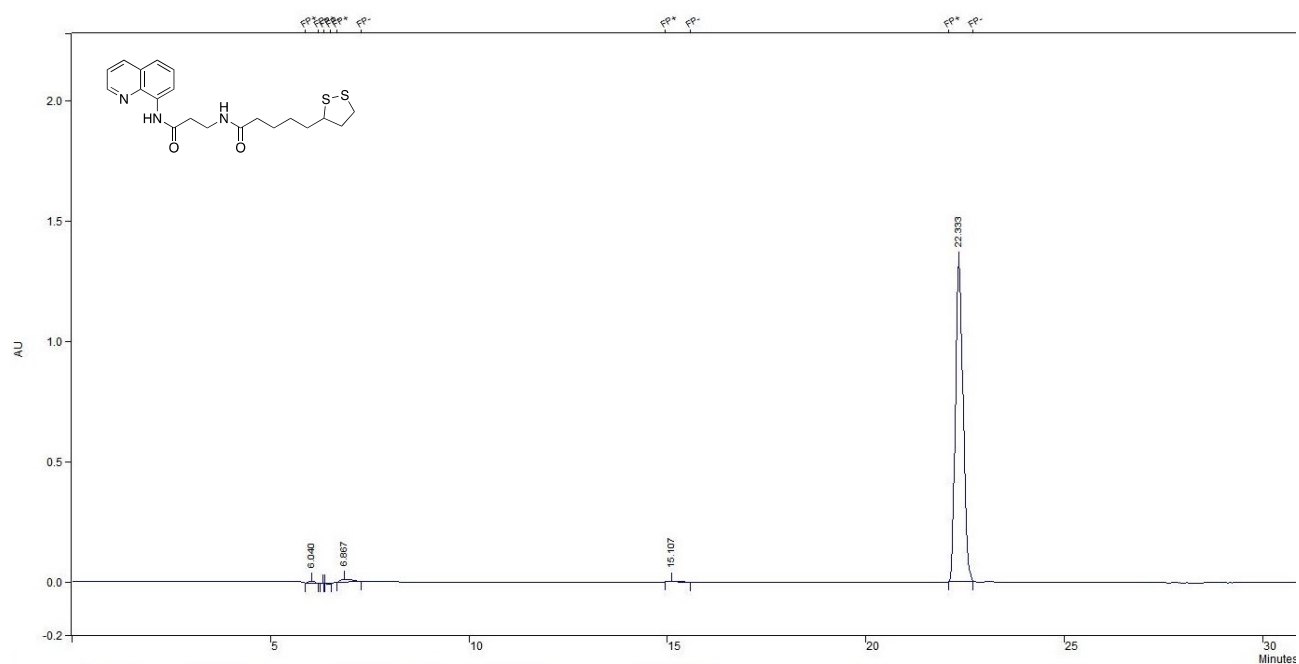

Title :  
 Run File : c:\documents and settings\varian\desktop\baccci\compound 2 h acn.run  
 Method File : c:\star\data\baccci\sl 56 h acn 1-12 c-2.mth  
 Sample ID : SI 64 H ACN 1-12

Injection Date: 09/05/2022 16.52 Calculation Date: 09/05/2022 17.58

Operator : Workstation: HPLC  
 Detector Type: 330 UV-Vis. PDA  
 Bus Address : 71  
 Instrument : Varian Star #1  
 Sample Rate : 0.63 Hz  
 Channel : 2 = 240.00 nm  
 Run Time : 31.013 min

\*\* LC Workstation Version 6.41 \*\* 01938-61c0-ea4-04b0 \*\*

Run Mode : Analysis  
 Peak Measurement: Peak Area  
 Calculation Type: Percent

| Peak No. | Peak Name | Result (%) | Ret. Time (min) | Time Offset (min) | Area (counts) | Sep. Code | 1/2 (sec) | Status Codes |
|----------|-----------|------------|-----------------|-------------------|---------------|-----------|-----------|--------------|
| 1        |           | 0.5170     | 6.040           | 0.000             | 488785        | BB        | 10.1      |              |
| 2        |           | 1.1710     | 6.867           | 0.000             | 1107053       | BB        | 23.3      |              |
| 3        |           | 0.3042     | 15.107          | 0.000             | 287635        | BB        | 13.2      |              |
| 4        |           | 98.0078    | 22.333          | 0.000             | 92657848      | BB        | 12.9      |              |
| Totals:  |           | 100.0000   |                 | 0.000             | 94541321      |           |           |              |

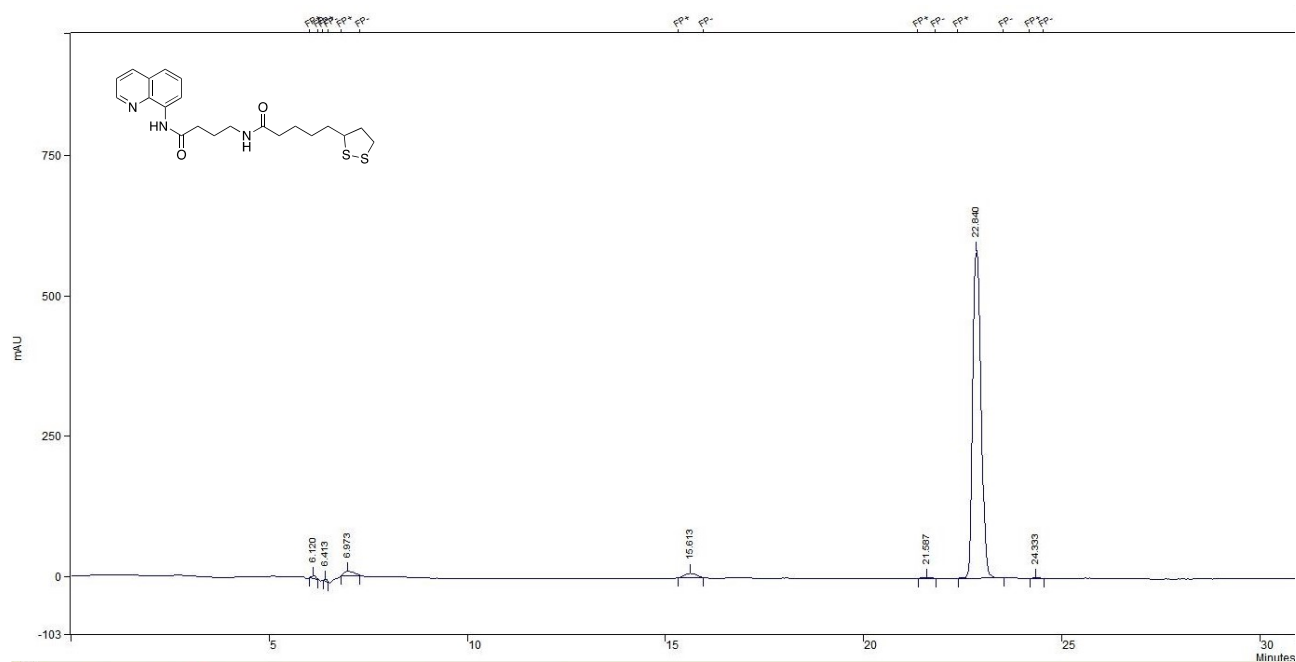

Title :  
Run File : c:\documents and settings\varian\desktop\bacci\compound 3 h acn.run  
Method File : c:\star\data\bacci\si 56 h acn 1-12 c-2.mth  
Sample ID : SI56 H ACN H 1-12 C

Injection Date: 09/05/2022 13.59 Calculation Date: 19/05/2022 10.54

Operator :  
Workstation: HPLC  
Instrument : Varian Star #1  
Channel : 2 = 240.00 nm  
Detector Type: 330 UV-Vis. PDA  
Bus Address : 71  
Sample Rate : 0.63 Hz  
Run Time : 31.013 min

\*\* LC Workstation Version 6.41 \*\* 01938-61c0-ea4-04b0 \*\*

Run Mode : Analysis  
Peak Measurement: Peak Area  
Calculation Type: Percent

| Peak No. | Peak Name | Result (%) | Ret. Time (min) | Time Offset (min) | Area (counts) | Sep. Code | 1/2 (sec) | Status Codes |
|----------|-----------|------------|-----------------|-------------------|---------------|-----------|-----------|--------------|
| 1        |           | 0.4992     | 6.120           | 0.000             | 226791        | BB        | 7.3       |              |
| 2        |           | 0.1659     | 6.413           | 0.000             | 75357         | BB        | 3.4       |              |
| 3        |           | 1.4702     | 6.973           | 0.000             | 667949        | BB        | 18.6      |              |
| 4        |           | 1.7996     | 15.613          | 0.000             | 817613        | BB        | 21.3      |              |
| 5        |           | 0.2441     | 21.597          | 0.000             | 110917        | BB        | 15.8      |              |
| 6        |           | 95.7174    | 22.840          | 0.000             | 43457596      | BB        | 19.8      |              |
| 7        |           | 0.1036     | 24.333          | 0.000             | 47080         | BB        | 13.3      |              |
| Totals:  |           | 100.0000   |                 | 0.000             | 45433303      |           |           |              |

## Compound 4

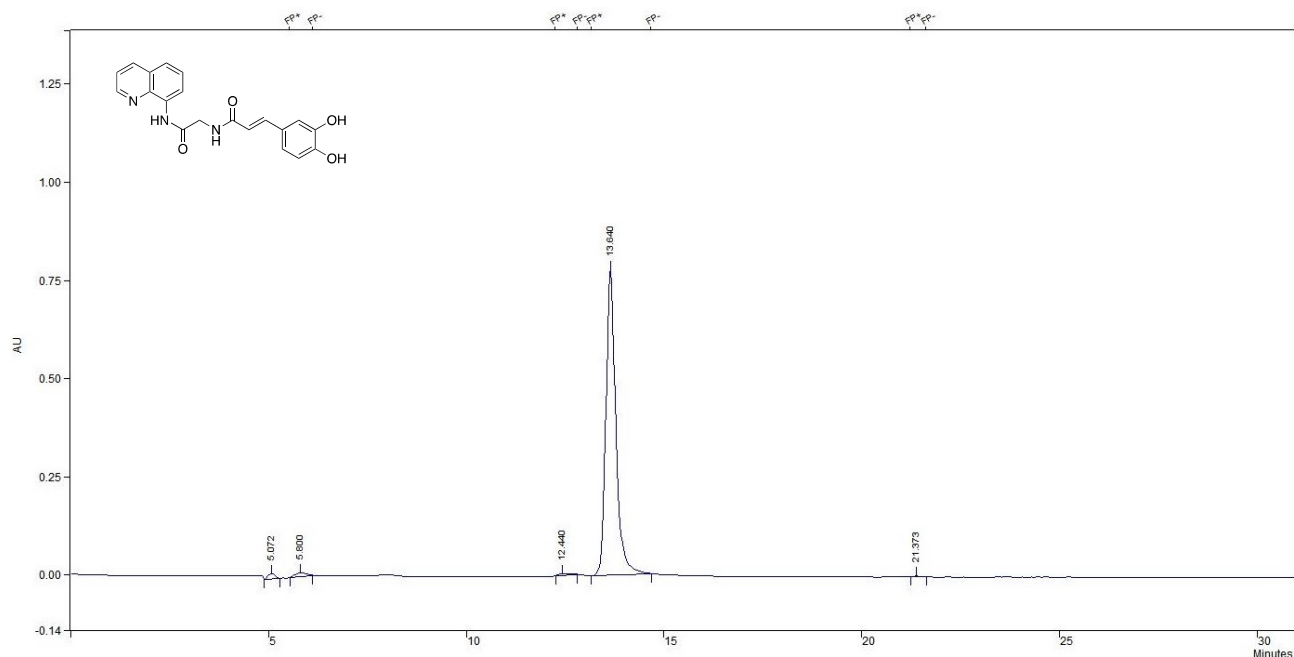

Title :  
 Run File : c:\documents and settings\varian\desktop\bacchi\compound 4 h acn.run  
 Method File : c:\star\data\bacchi\si 27 h acn-2.mth  
 Sample ID : SI 27 H ACN

Injection Date: 06/05/2022 10:18 Calculation Date: 11/05/2022 15:32

Operator : HPLC Detector Type: 330 UV-Vis. PDA  
 Workstation: HPLC Bus Address : 71  
 Instrument : Varian Star #1 Sample Rate : 0.63 Hz  
 Channel : 2 = 240.00 nm Run Time : 31.013 min

\*\* LC Workstation Version 6.41 \*\* 01998-61c0-ea4-04b0 \*\*

Run Mode : Analysis  
 Peak Measurement: Peak Area  
 Calculation Type: Percent

| Peak No. | Peak Name | Result () | Ret. Time (min) | Time Offset (min) | Area (counts) | Sep. 1/2 Code (sec) | Status Codes |
|----------|-----------|-----------|-----------------|-------------------|---------------|---------------------|--------------|
| 1        |           | 1.0883    | 5.072           | 0.000             | 791303        | BB 13.1             |              |
| 2        |           | 1.2115    | 5.800           | 0.000             | 880839        | BB 26.2             |              |
| 3        |           | 0.5502    | 12.440          | 0.000             | 400043        | BB 30.3             |              |
| 4        |           | 97.0028   | 13.640          | 0.000             | 70528120      | BB 15.2             |              |
| 5        |           | 0.1471    | 21.373          | 0.000             | 106976        | BB 10.4             |              |
| Totals:  |           |           | 99.9999         | 0.000             | 72707281      |                     |              |

## Compound 5

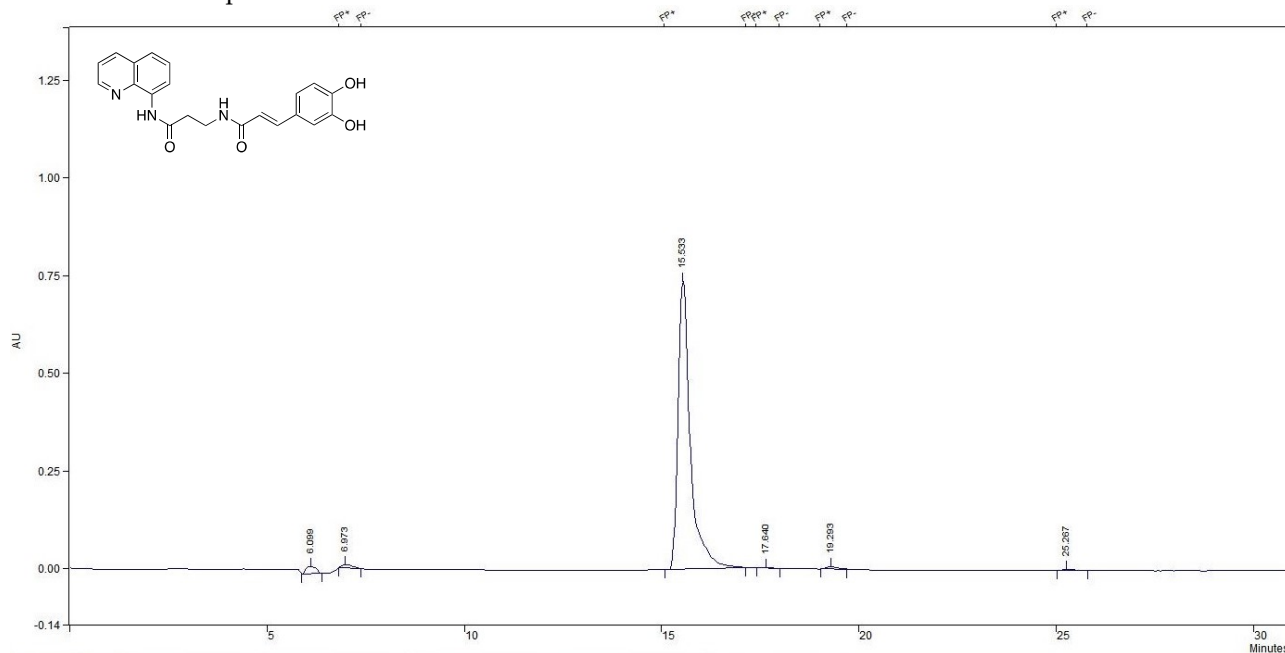

Title :  
 Run File : c:\documents and settings\varian\desktop\bacci\compound 5 h acn.run  
 Method File : c:\star\data\bacci\si 63 h acn 1-6-2.mth  
 Sample ID : SI 63 H ACN 1-6

Injection Date: 06/05/2022 15.08 Calculation Date: 13/05/2022 10.50

Operator :  
 Workstation: HPLC  
 Instrument : Varian Star #1  
 Channel : 2 = 240.00 nm  
 Detector Type: 330 UV-Vis. FDA  
 Bus Address : 71  
 Sample Rate : 0.63 Hz  
 Run Time : 31.013 min

\*\* LC Workstation Version 6.41 \*\* 01938-61c0-ea4-04b0 \*\*

Run Mode : Analysis  
 Peak Measurement: Peak Area  
 Calculation Type: Percent

| Peak No. | Peak Name | Result (%) | Ret. Time (min) | Time Offset (min) | Area (counts) | Sep. Code | 1/2 (sec) | Status Codes |
|----------|-----------|------------|-----------------|-------------------|---------------|-----------|-----------|--------------|
| 1        |           | 1.9285     | 6.099           | 0.000             | 1654871       | BB        | 19.0      |              |
| 2        |           | 0.9576     | 6.973           | 0.000             | 821741        | BB        | 17.6      |              |
| 3        |           | 95.9189    | 15.533          | 0.000             | 82310720      | BB        | 17.8      |              |
| 4        |           | 0.2148     | 17.640          | 0.000             | 184284        | BB        | 12.7      |              |
| 5        |           | 0.6672     | 19.293          | 0.000             | 572517        | BB        | 17.8      |              |
| 6        |           | 0.9131     | 25.267          | 0.000             | 268664        | BB        | 20.5      |              |
| Totals:  |           | 100.0001   |                 | 0.000             | 85812797      |           |           |              |

## Compound 6

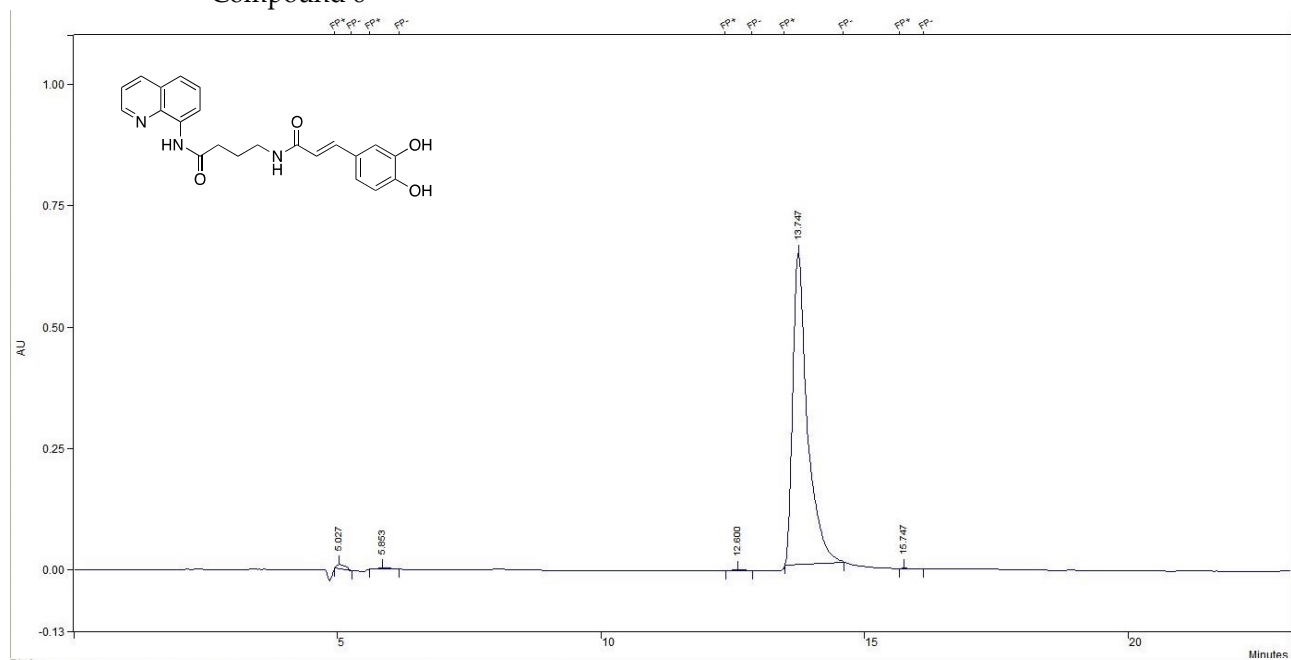

Title :  
 Run File : c:\documents and settings\varian\desktop\bacchi\compound 6 h acn .run  
 Method File : c:\star\data\bacchi\si 24 h acn -2.mth  
 Sample ID : sSI 24 H ACN

Injection Date: 05/05/2022 16.38 Calculation Date: 13/05/2022 10.49

Operator :  
 Workstation: HPLC  
 Instrument : Varian Star #1  
 Channel : 2 = 240.00 nm  
 Detector Type: 330 UV-Vis. PDA  
 Bus Address : 71  
 Sample Rate : 0.63 Hz  
 Run Time : 23.120 min

\*\* LC Workstation Version 6.41 \*\* 01998-61c0-ea4-04b0 \*\*

Run Mode : Analysis  
 Peak Measurement: Peak Area  
 Calculation Type: Percent

| Peak No. | Peak Name | Result (%) | Ret. Time (min) | Time Offset (min) | Area (counts) | Sep. 1/2 Code (sec) | Status Codes |
|----------|-----------|------------|-----------------|-------------------|---------------|---------------------|--------------|
| 1        |           | 0.7476     | 5.027           | 0.000             | 482938        | BB 9.2              |              |
| 2        |           | 0.4164     | 5.853           | 0.000             | 268990        | BB 15.7             |              |
| 3        |           | 0.1795     | 12.600          | 0.000             | 116946        | BB 19.8             |              |
| 4        |           | 98.5946    | 13.747          | 0.000             | 63687904      | BB 16.1             |              |
| 5        |           | 0.0619     | 15.747          | 0.000             | 39989         | BB 4.4              |              |
| Totals:  |           | 100.0000   |                 | 0.000             | 64595767      |                     |              |

## Compound 7

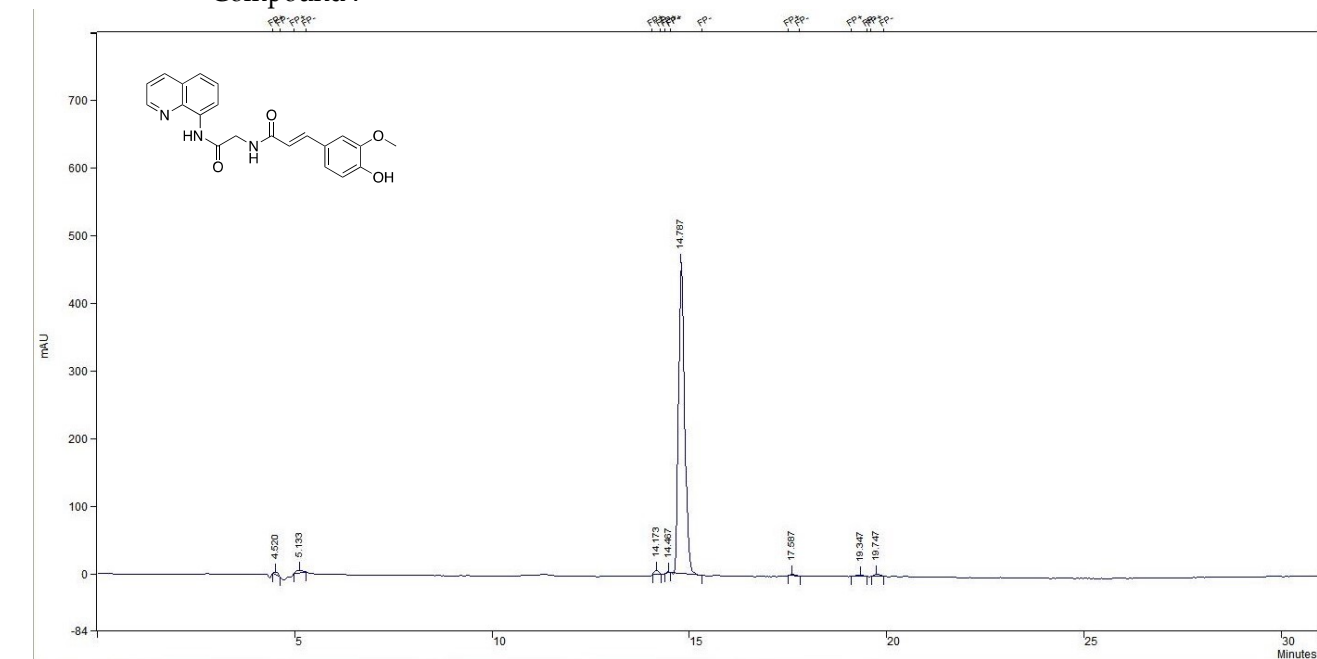

Title :  
 Run File : c:\documents and settings\varian\desktop\bacchi\compound 7 h acn.run  
 Method File : c:\star\data\bacchi\si 37 h acn 1-6 at2-2.mch  
 Sample ID : si 37 h acn 1-6 at2

Injection Date: 12/05/2022 16.58 Calculation Date: 12/05/2022 18.53

Operator :  
 Workstation: HPLC  
 Instrument : Varian Star #1  
 Channel : 2 = 240.00 nm

Detector Type: 330 UV-Vis. PDA  
 Bus Address : 71  
 Sample Rate : 0.63 Hz  
 Run Time : 31.013 min

\*\* LC Workstation Version 6.41 \*\* 01938-61c0-ea4-04b0 \*\*

Run Mode : Analysis  
 Peak Measurement: Peak Area  
 Calculation Type: Percent

| Peak No. | Peak Name | Result (%) | Ret. Time (min) | Time Offset (min) | Area (counts) | Sep. Code | 1/2 (sec) | Status Codes |
|----------|-----------|------------|-----------------|-------------------|---------------|-----------|-----------|--------------|
| 1        |           | 0.6667     | 4.520           | 0.000             | 175246        | BB        | 6.1       |              |
| 2        |           | 0.8573     | 5.133           | 0.000             | 225365        | BB        | 15.9      |              |
| 3        |           | 0.6451     | 14.173          | 0.000             | 169566        | BB        | 7.8       |              |
| 4        |           | 0.1883     | 14.467          | 0.000             | 45174         | BB        | 5.8       |              |
| 5        |           | 96.1359    | 14.787          | 0.000             | 25271500      | BB        | 9.9       |              |
| 6        |           | 0.3115     | 17.587          | 0.000             | 81891         | BB        | 7.9       |              |
| 7        |           | 0.4977     | 19.347          | 0.000             | 130838        | BB        | 14.0      |              |
| 8        |           | 0.7025     | 19.747          | 0.000             | 184674        | BB        | 10.3      |              |
| Totals:  |           |            | 100.0000        | 0.000             | 26287254      |           |           |              |

## Compound 8

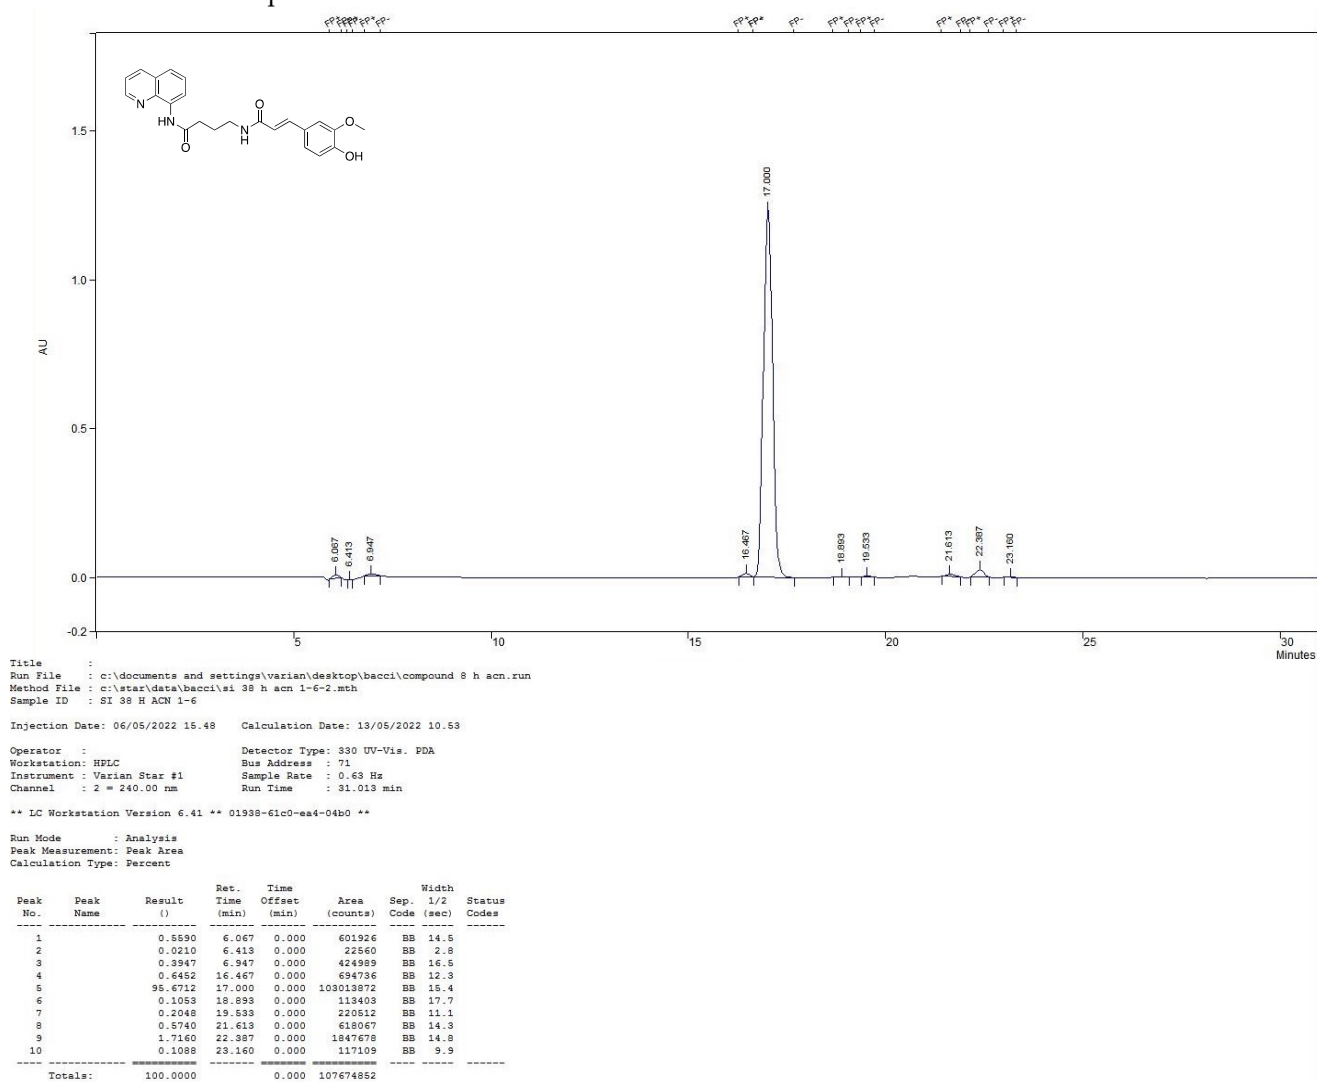

### 3. Copper chelating study

Standard solutions of compounds 1-8 were prepared in 100% DMSO and diluted in absolute ethanol to reach the concentration of 20  $\mu\text{M}$  (DMSO final concentration < 0.1%). A 4X stock solution of  $\text{CuCl}_2$  was prepared at concentration of 800  $\mu\text{M}$  in absolute ethanol. 100  $\mu\text{L}$  of this solution was transfected in a 96-well plate and diluted to obtain progressive final concentrations of 100, 50, 25, 12.5, 6.25, 3.125, 1.56, 0  $\mu\text{M}$ . Then, 100  $\mu\text{L}$  of each compound solutions were added in every well obtaining a final concentration of compounds of 10  $\mu\text{M}$  (duplicated). After 30 minutes of incubation in a dark room, the absorption spectrum was recorded at room temperature with UV-vis spectrophotometer PerkinElmer EnSpire 2300. Absorption spectra were collected detecting values at different wavelengths (230-500 nm) and normalized with control (ethanol solution) and then analyzed the absorbance values in function of wavelength using SpectraGryph 1.2.

### 4. DPPH assay

In this method, the scavenging activity of the colored radical by synthesized compounds is followed by spectrophotometry. Standard solutions of compounds 1-8 were prepared in 100% DMSO and diluted in absolute methanol to reach the concentration of 400  $\mu\text{M}$  (DMSO final concentration < 0.1%). 75  $\mu\text{L}$  of each compound solution were properly diluted to 200 and 100  $\mu\text{M}$  and then added with 75  $\mu\text{L}$  of 1mM methanolic solution of DPPH (final DPPH concentration 500  $\mu\text{M}$ , final concentrations of compounds 200, 100 and 50  $\mu\text{M}$ , duplicated). The well was incubated in a dark room, at room temperature for 45 minutes and the absorbance values was measured at 531 nm with PerkinElmer Enspire 2300 multiplate reader. Instead, for detect  $\text{IC}_{50}$  of selected compounds, in a 96-well plate 300  $\mu\text{M}$  methanolic solutions of compounds (75  $\mu\text{L}$ ) were properly diluted to 150, 75, 37.5, 18.8, 9.4, 4.7 and 0  $\mu\text{M}$  (duplicated). Then, in each well were added 75  $\mu\text{L}$  of a 1 mM methanolic solutions of DPPH (final well concentration 500 nM). The well was incubated in a dark room, at room temperature for 45 minutes and the absorbance values was measured at 531 nm with PerkinElmer Enspire 2300 multiplate reader. All the values were then mediated, normalized with control (only methanol) and the scavenging activity percentage calculated with the formula:

$$\text{scavenging capacity \%} = 100 * \frac{\text{Abs}_{\text{DPPH}} - \text{Abs}_{\text{compound}}}{\text{Abs}_{\text{DPPH}}}$$

## 5. Cell viability

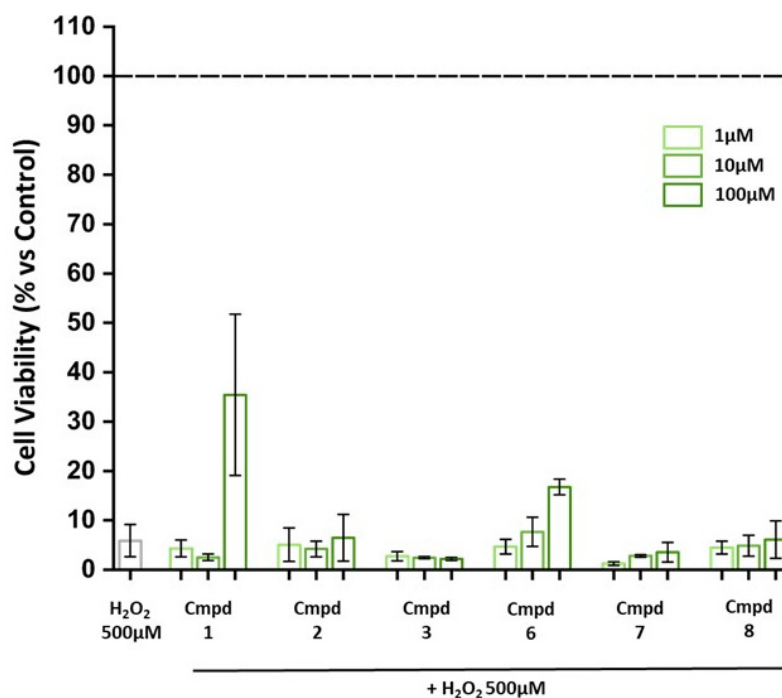

Figure S1. Cell viability was analysed by CellTiter 96 Aqueous – One solution Reagent. Cells were pre-treated for 24 h with compounds at various concentration (1-10-100µM) and then exposed for 3 h with H<sub>2</sub>O<sub>2</sub> 500µM. The dashed line indicates the reference value of Ctrl: control group - no compounds or H<sub>2</sub>O<sub>2</sub> exposure. Values in the graph indicate % viability as the mean ± SE obtained from a n=3 of independent experiments
